# Supplementary material for: Lysophosphatidic Acid Triggers Apoptosis in HeLa Cells through the Upregulation of Tumor Necrosis Factor Receptor Superfamily Member 21
Source: Hindawi journal article supplement (doi:10.1155/2017/2754756), 2017-01-01
Supplement: f1 [file 2754756.f1.pdf]

**Supplementary Table 1** Primers for PCR, reverse transcriptional PCR and qPCR

| Human Gene     | Forward 5'-->3'      | Reverse 5'-->3'      | Expected size (bp) | Position in cDNAs | Type of PCR                     |
|----------------|----------------------|----------------------|--------------------|-------------------|---------------------------------|
| LPAR1          | CACAGCCATGAATGAACCAC | TACAGTTCCAGCCCACACTG | 518                | 48-565            | Regular PCR                     |
| LPAR2          | TTTCACTTGAGGGCTGGTTC | GACATTGCAGGACTCACAGC | 524                | 296-819           | Regular PCR                     |
| LPAR3          | GGCACATGTCAATCATGAGG | GCCATACATGTCCTCGTCCT | 527                | 380-906           | Regular PCR                     |
| DR6 (1)        | CTTAGCACCACCACAGCTCA | ACAGCAGGTCAGGAAGATGG | 1861               | 106-1966          | Reverse transcription (RT-) PCR |
| DR6 (2)        | TCCCTGACAACACAAGCTCA | CTCACTGGCATTGCAAAGAA | 503                | 824-1326          | Reverse transcription (RT-) PCR |
| DR6 (3)        | CAGCTCAGCCAGAACAGAAG | GGCTTGTTGGTACAATGC   | 135                | 119-234           | qPCR                            |
| Gapdh          | AAGGTGAAGGTCGGAGTCAA | TGTGGTCATGAGTCCTCCA  | 525                | 7-531             | Regular PCR and RT-PCR control  |
| $\beta$ -actin | TGGACTTCGAGCAAGAGATG | GAAGGAAGGCTGGAAGAGTG | 137                | 662-779           | qPCR control                    |

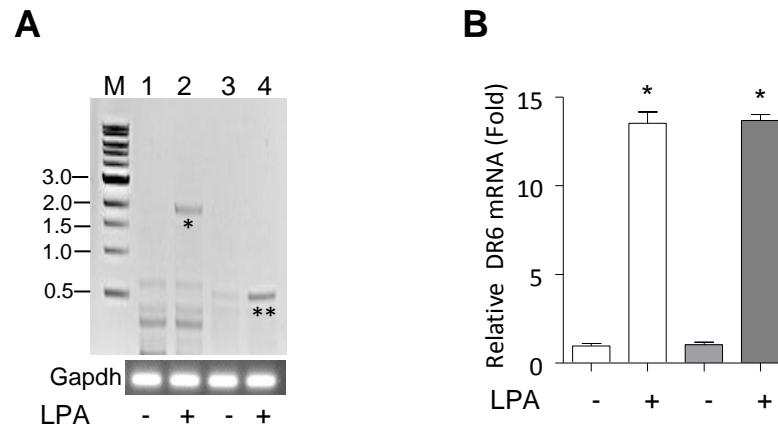

**Supplementary Figure 1** LPA upregulates DR6 expression is confirmed by reverse transcriptional (RT)-PCR. (A). lane 1 & 3, control, lane 2 & 4, cells were treated by 25 $\mu$ M LPA treatment for 8 hours. RNA was extracted by Trizol. (B) Quantification for figure (A). n=3, \* LPA treatment vs. control,  $P<0.0001$ .

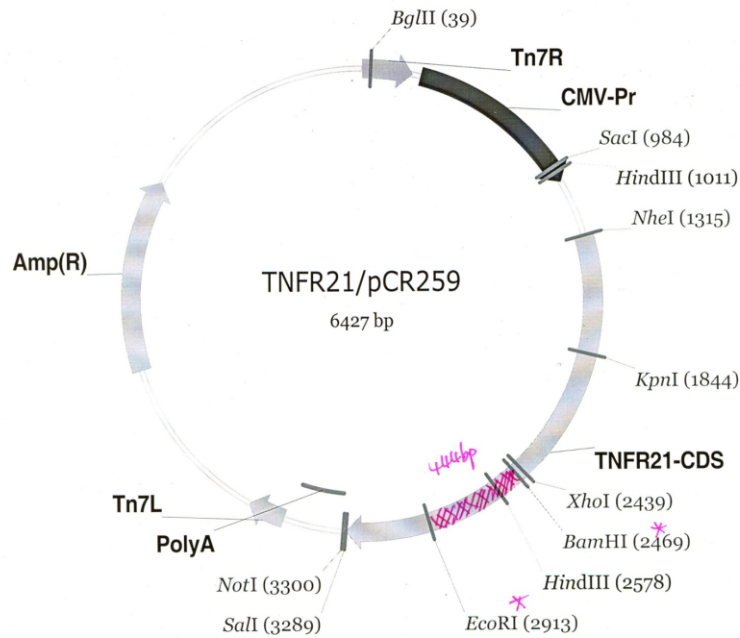

**Supplementary Figure 2** DR6 (TNFR21) expression vector. DR6 was inserted into adenovirus expression system (showing DR6 cloned in transfer vector). DR6 is cloned into adenoviral transfer vector pCR259 (Q-biogene), generating TNFR21/pCR259 plasmid, which can be amplified in *E. coli*. Figure shows the probe used in Northern blot released by EcoRI/BamHI digest (444bp length).
